# Supplementary material for: Философско-педагогическая рефлексия принципа наглядности
Source: Royal Society of Chemistry journal article supplement (doi:10.1039/c5cp07016c), 2010-01-01
Supplement: c5cp07016c1.pdf [file c5cp07016c1.pdf]

## Self pairing of 1-methylthymine and thymidine mediated by two and three Ag(I) ions: a gas phase study using infrared dissociation spectroscopy and density functional theory

Yevgeniy Nosenko, Christoph Riehn, Gereon Niedner-Schatteburg

FB Chemie und Forschungszentrum OPTIMAS, TU Kaiserslautern, Erwin-Schrödinger-Str. 52, Kaiserslautern 67663, DE

### Electronic supplementary information (ESI)

The isomers encoding is based on locating the protonation (hX) and silver coordination (agXY) sites of the ligands. The positions (X,Y) are indicated according to the standard ring numbering of thymine starting from the methylated nitrogen atom (glycosidic site) with another nitrogen atom acquiring number three. So, the two carbonyl groups are described thus as positions two and four (see Fig. 1). The orientation of the OH bond approximately perpendicular to the N3C6 axis is indicated by the prime (') sign. For example, the ag2343h4' abbreviation describes a complex characterized by the C2O-Ag<sup>I</sup>-N3 and C4O-Ag<sup>I</sup>-N3 coordinative bridges with the O4H bond being ca. perpendicular to the N3C6 axis of the corresponding ligand (Fig. S1g).

**Table S1.** Single point energies ( $E_{sp}$ (B3LYP), in hartree), relative Gibbs energies ( $\Delta G_T$ ) at T=0 and T=298 K (in kJ/mol) and Ag-Ag distances (in pm) for selected isomers of  $[Ag_2(1MT-H)(1MT)]^+$  calculated at the B3LYP/B3LYP-D3/CPCM-B3LYP-D3 level (basis set: aug-cc-pVDZ/ECP), as well as corresponding Boltzmann populations (in %).

| isomer    | $E_{sp}$      | d(Ag-Ag)          | $\Delta G_0$   | $\Delta G_{298}$ | Population     |
|-----------|---------------|-------------------|----------------|------------------|----------------|
| ag2433h4  | -1280.3118450 | 282.3/282.5/283.2 | 0.0/0.0/0.0    | 0.0/0.0/1.5      | 49.0/65.6/20.4 |
| ag2424h3  | -1280.3112654 | 475.6/473.9/467.8 | 3.1/6.1/13.1   | 3.1/6.1/14.0     | 14.4/5.9/0.1   |
| ag2244h3  | -1280.3111489 | 475.5/473.8/467.8 | 3.4/6.5/13.2   | 3.4/6.4/14.1     | 12.8/5.3/0.1   |
| ag2433h4' | -1280.3097174 | 284.9/285.0/284.4 | 5.2/5.2/1.4    | 4.5/4.7/4.2      | 8.3/10.3/7.0   |
| ag2343h4' | -1280.3091174 | 286.2/285.8/283.6 | 6.6/6.5/0.1    | 5.2/5.9/0.2      | 6.3/6.4/34.0   |
| ag2343h4  | -1280.308995  | 284.7/284.4/282.8 | 7.1/8.3/0.0    | 5.6/7.1/0.0      | 5.4/4.0/36.8   |
| ag2233h4  | -1280.3087312 | 286.1/284.4/286.0 | 7.8/9.0/5.8    | 6.6/8.4/8.2      | 3.6/2.4/1.5    |
| ag4433h2  | -1280.3059693 | 281.6/281.6/283.4 | 15.1/15.2/14.4 | 14.8/14.9/16.8   | 0.1/0.2/0.0    |
| ag2323h4' | -1280.3052445 | 292.6/289.5/285.2 | 16.0/17.4/5.9  | 12.5/15.6/5.7    | 0.4/0.1/3.9    |
| ag4233h2  | -1280.3030926 | 284.2/283.4/284.8 | 22.5/23.4/19.7 | 21.6/22.6/21.7   |                |
| ag4343h2' | -1280.2966037 | 284.8/284.4/282.0 | 38.1/38.1/23.6 | 36.3/36.9/25.1   |                |
| ag4323h2' | -1280.2925086 | 289.7/287.3/283.4 | 48.2/49.5/29.1 | 44.4/47.3/29.4   |                |

**Table S2.** Experimentally observed vibrational frequencies (in  $\text{cm}^{-1}$ ) and assignments for the investigated silver complexes of 1-methylthymine and thymidine.

| $[\text{Ag}_2(1\text{MT-H})(1\text{MT})]^+$ | $[\text{Ag}_3(1\text{MT-H})_2]^+$ | $[\text{Ag}_3(\text{dT-H})_2]^+$ | Assignment <sup>a</sup>                                                                      |
|---------------------------------------------|-----------------------------------|----------------------------------|----------------------------------------------------------------------------------------------|
|                                             |                                   | 3655                             | $\nu(\text{OH})^f(\text{sugar})$                                                             |
| 3598                                        |                                   |                                  | $\nu(\text{OH})^f$                                                                           |
| 3488                                        |                                   |                                  | $\nu(\text{OH})^{\text{Ag}}$                                                                 |
| 2988/2867/2940                              |                                   | 2943                             | $\nu(\text{CH}/\text{CH}_2/\text{CH}_3)$                                                     |
| 1667                                        | ~1660                             | 1648                             | $\nu(\text{C}5\text{C}6)$                                                                    |
| 1632                                        |                                   |                                  | $\nu(\text{C}2\text{O})^{\text{Ag}}(\text{xT}) +$<br>$\nu(\text{C}2\text{O})^f(\text{xT-H})$ |
|                                             | 1580                              | 1579                             | $\nu(\text{C}2\text{O})^{\text{Ag}}(\text{xT-H})$                                            |
| 1560/1555                                   |                                   |                                  | $\beta(\text{OH})^{\text{Ag}}/\beta(\text{OH})^f$                                            |
| 1518                                        | 1536                              | 1535                             | $\nu(\text{C}4\text{O})^{\text{Ag}}(\text{xT-H})$                                            |
| 1484/1463/1437                              |                                   |                                  | $\beta(\text{CH}_3) + \text{ring def.}$                                                      |
| 1374/1336                                   |                                   |                                  | $\beta(\text{C}6\text{H})$                                                                   |

<sup>a</sup> xT = 1-methylthymine/thymidine

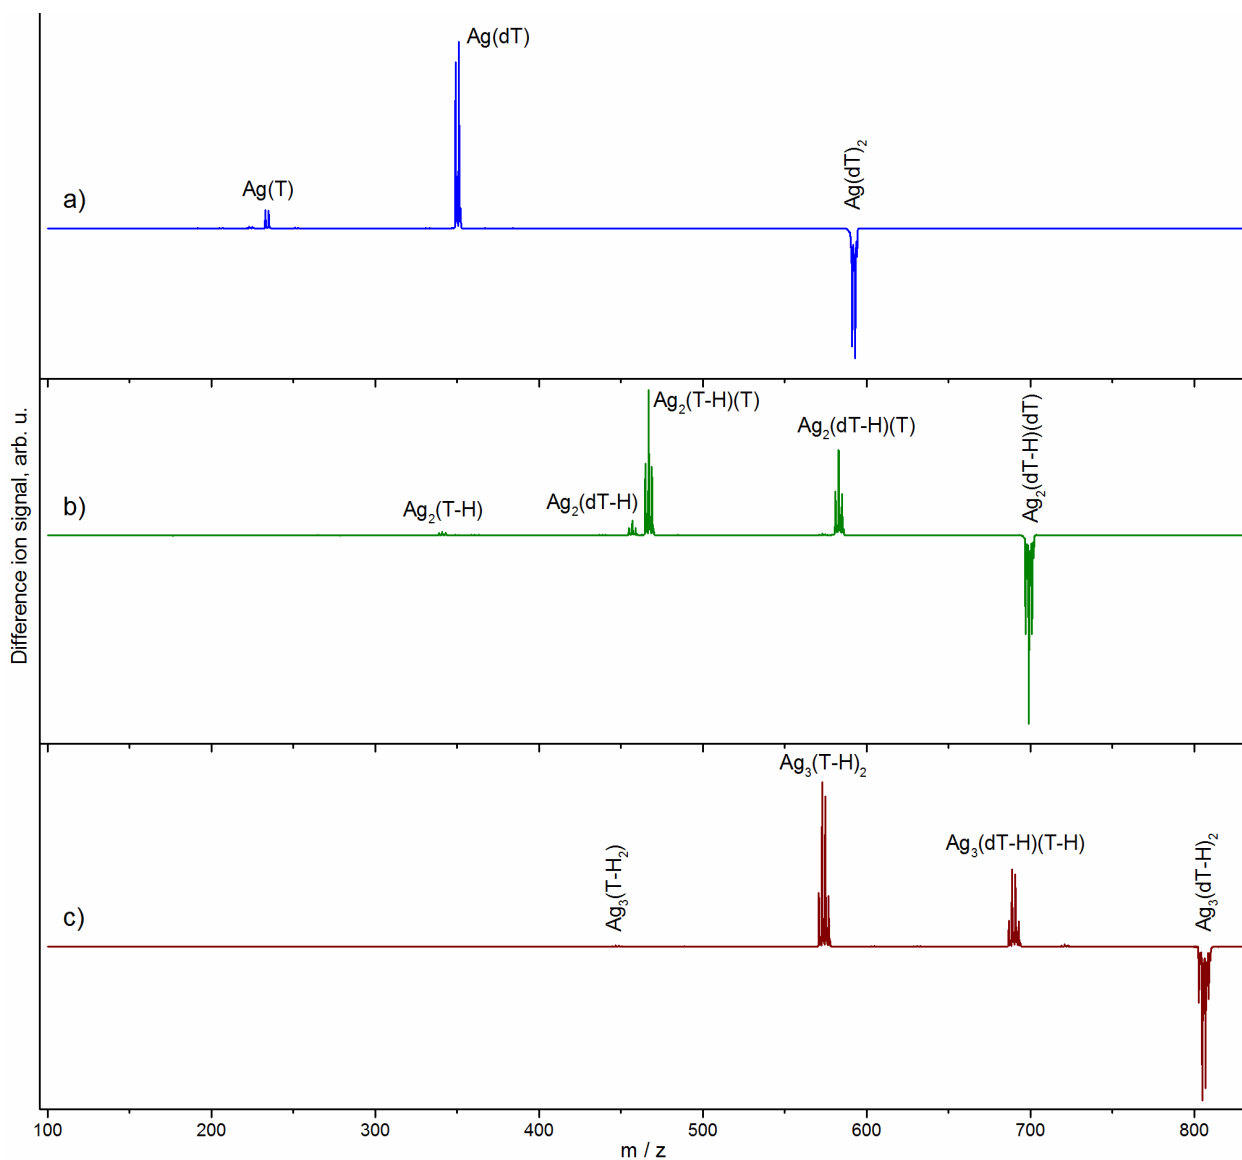

**Figure S1.** Difference mass spectra emphasizing IR induced fragmentations measured at the corresponding C=O stretch modes for the a)  $[Ag(dT)_2]^+$ , b)  $[Ag_2(dT-H)(dT)]^+$  and c)  $[Ag_3(dT-H)_2]^+$  complexes. The negative signals indicate depletion of the parent ions; the positive peaks show appearance of the related ion fragments. Assignments for the major ionic fragments are given.

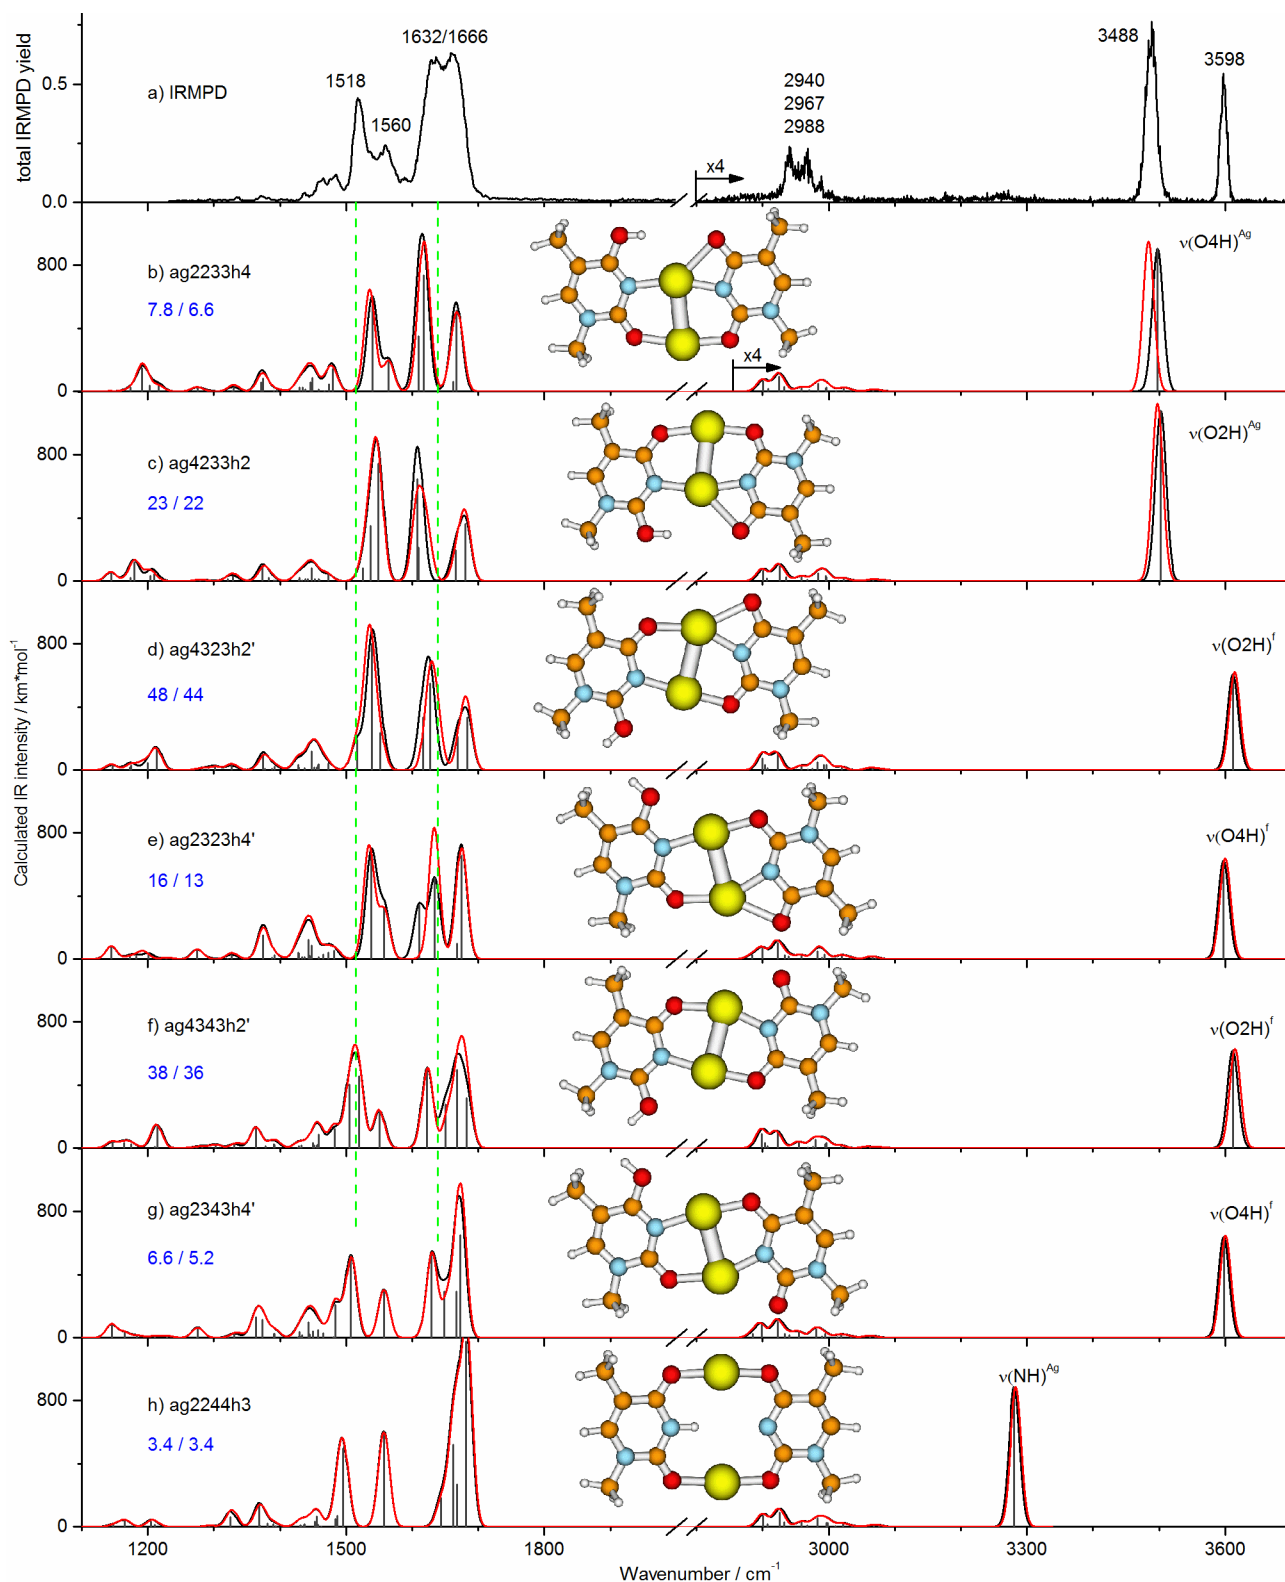

**Figure S2.** a) IRMPD of  $[\text{Ag}_2(1\text{MT-H})(1\text{MT})]^+$  and b)-h) linear IR absorption spectra of its selected isomers calculated at the B3LYP/aug-cc-pVDZ/ECP level and simulated with Gaussian beam profile of  $\text{fwhm}=20 \text{ cm}^{-1}$  (black lines). The red traces show the spectra based on B3LYP-D3 calculations. Calculated vibrational frequencies above and below  $2000 \text{ cm}^{-1}$  were scaled by 0.954 and 0.986, respectively. The optimized structures as well as relative Gibbs free energies at 0/298 K are shown.

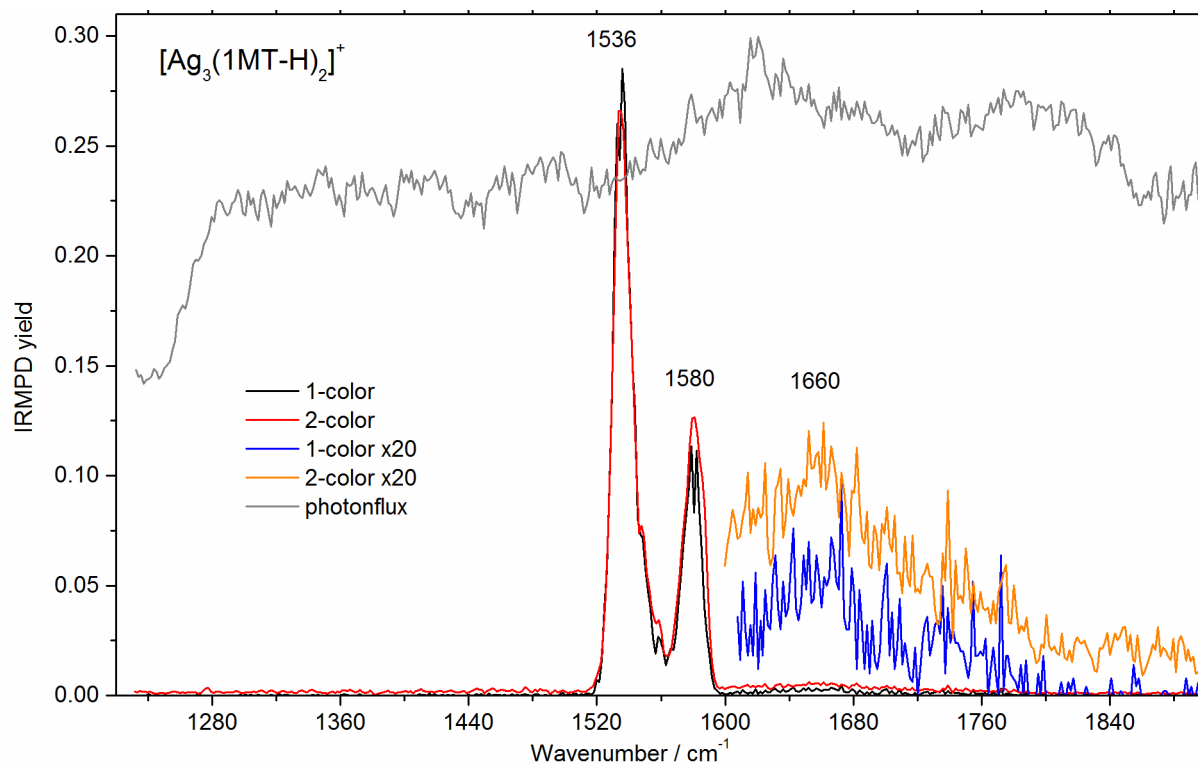

**Figure S3.** 1C- and 2C-IRMPD spectra of  $[\text{Ag}_3(1\text{MT-H})_2]^+$  (above 1600  $\text{cm}^{-1}$  also x20 zoomed) along with the laser photon flux curve.

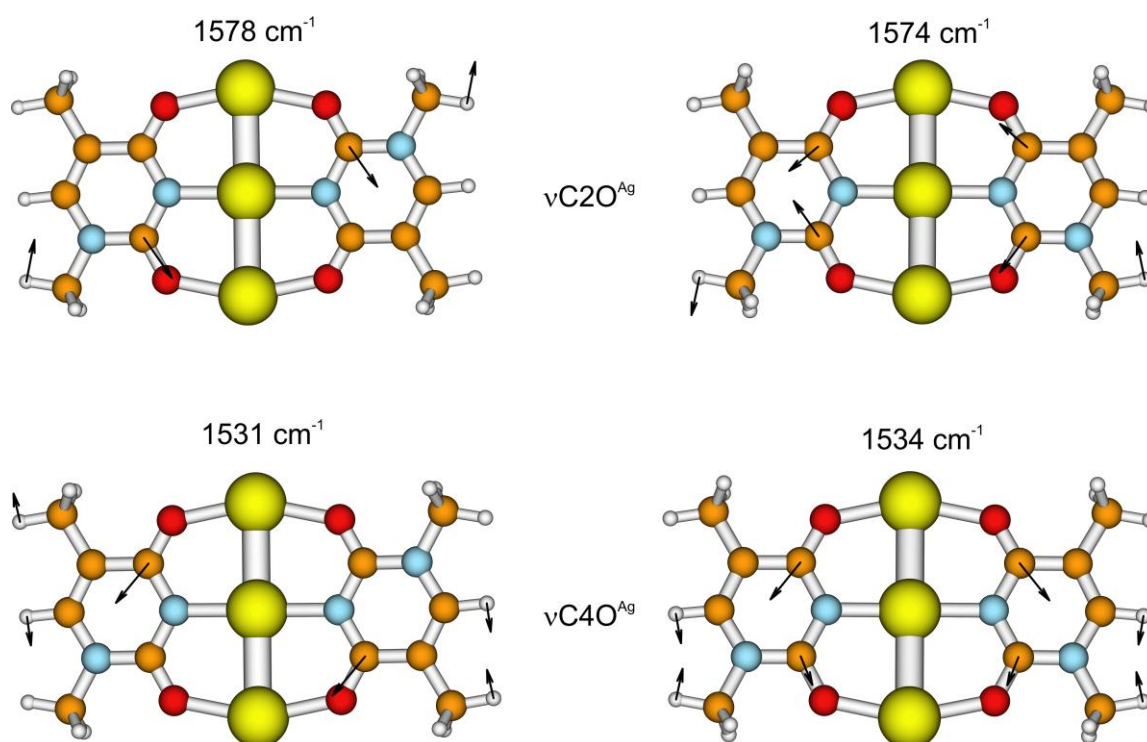

**Figure S4.** Normal coordinates of the ag243342 (left) and ag223344 (right) isomers corresponding to the allowed carbonyl stretch modes, calculated at the B3LYP/aug-cc-pVDZ level. The wavenumbers are scaled by the 0.986 factor. Insignificant vector displacements are omitted for clarity.

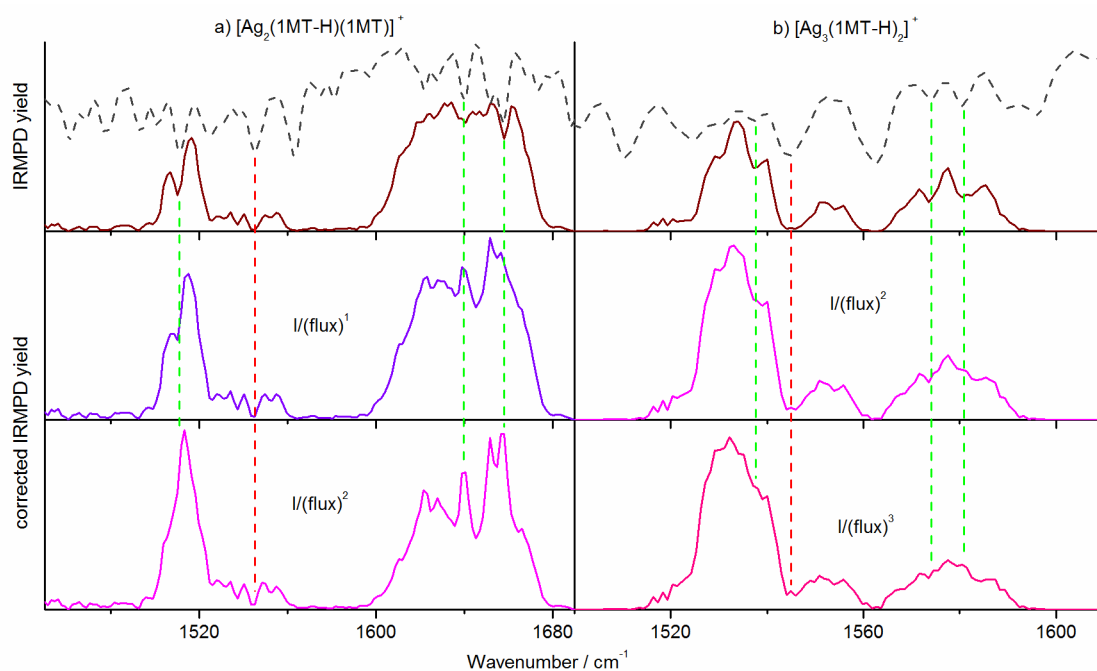

**Figure S5.** Top row: the IRMPD spectra (continuous lines) of the 1MT self pair mediated by a) two and b) three  $\text{Ag}^{\text{I}}$  ions measured in the carbonyl stretch region under ca. 10% of the relative humidity so that the laser photon flux curves (dashed lines) were significantly modulated due to atmospheric water absorption. The lower rows represent the corresponding IRMPD spectra corrected for suitable power functions of the photon flux. While the bands above  $1600\text{ cm}^{-1}$ , when not saturated, respond linearly to the flux, the  $<1600\text{ cm}^{-1}$  bands of the  $[\text{Ag}_2(1\text{MT-H})(1\text{MT})]^+$  and  $[\text{Ag}_3(1\text{MT-H})_2]^+$  ions show up to quadratic and cubic dependencies, respectively. The signal dips at  $1545\text{ cm}^{-1}$ , which could not be corrected within the applied models, clearly demonstrate the threshold character of the IRMPD process.

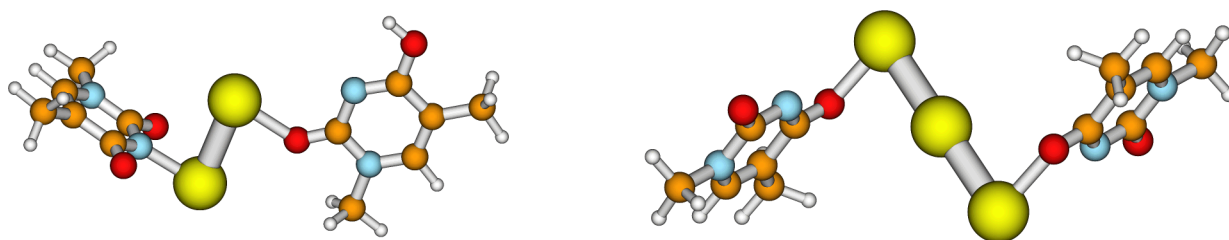

**Figure S6.** The model structures of the  $[\text{Ag}_2(1\text{MT-H})(1\text{MT})]^+$  and  $[\text{Ag}_3(1\text{MT-H})_2]^+$  complexes used for estimation of the Ag-Ag interaction.

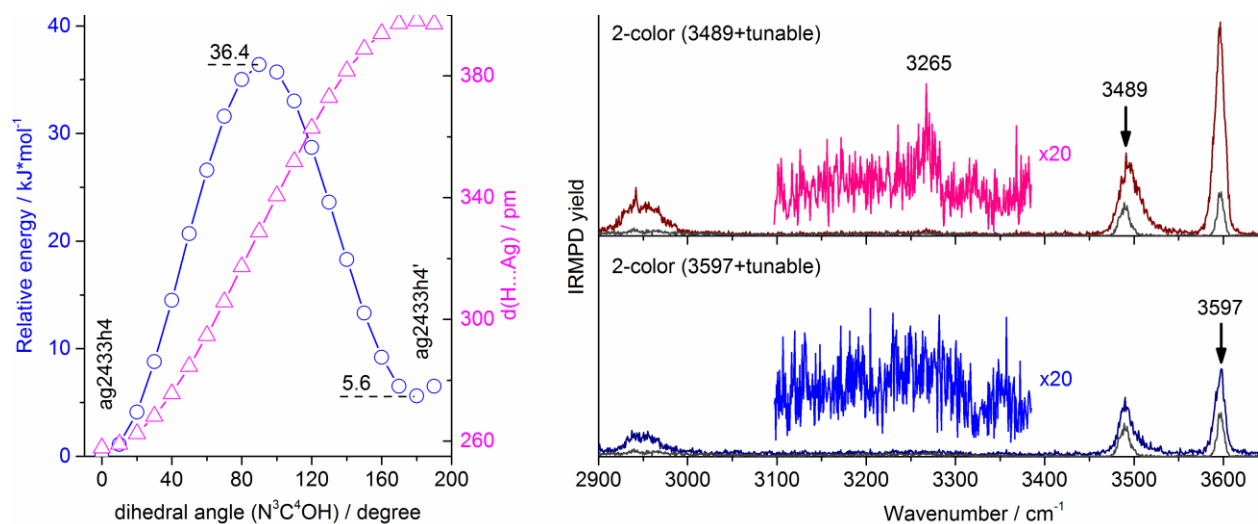

**Figure S7.** Right: fixed pump – tunable probe 2C-IRMPD spectra of  $[\text{Ag}_2(1\text{MT-H})(1\text{MT})]^+$  with the pump frequencies fixed as indicated by the arrows. Black trace represent the 1C-IRMPD spectrum recorded at otherwise the same conditions. Left: relaxed potential energy surface scan (B3LYP/aug-cc-pVDZ/ECP) for the energy minimum structure of  $[\text{Ag}_2(1\text{MT-H})(1\text{MT})]^+$  along the hydroxyl group torsion coordinate (blue circles) and the corresponding distances between the hydroxyl hydrogen atom and the silver centre (magenta triangles). The counterintuitive IR induced blue shift of the  $3488\text{ cm}^{-1}$  band can be understood in terms of weakening of the OH...Ag interaction upon “warming up” the low frequency out-of-plane vibrational degrees of freedom.

Cartesian coordinates of selected isomers under study.

ag243342

|    |          |          |          |
|----|----------|----------|----------|
| N  | -2.20653 | 0.64001  | 0.03912  |
| C  | -2.94234 | 1.7828   | -0.00549 |
| N  | -4.30574 | 1.69139  | 0.16036  |
| C  | -4.8974  | 0.46575  | 0.36273  |
| C  | -4.19501 | -0.69786 | 0.41149  |
| C  | -2.75882 | -0.59972 | 0.2385   |
| O  | -2.04598 | -1.64748 | 0.27373  |
| O  | -2.4452  | 2.93182  | -0.19122 |
| C  | -4.83536 | -2.03839 | 0.63265  |
| Ag | -0.11738 | 0.81162  | -0.20842 |
| H  | -5.97854 | 0.48822  | 0.48304  |
| H  | -4.62614 | -2.71401 | -0.20778 |
| H  | -5.92172 | -1.9409  | 0.74185  |
| H  | -4.43353 | -2.51824 | 1.5354   |
| C  | -5.10326 | 2.92642  | 0.11583  |
| H  | -4.98001 | 3.41715  | -0.85553 |
| H  | -4.77424 | 3.61296  | 0.90322  |
| H  | -6.15326 | 2.66411  | 0.26805  |
| C  | 2.70804  | -0.15867 | -0.40523 |
| C  | 2.5244   | 2.2238   | -0.65002 |
| N  | 1.97205  | 0.98395  | -0.45182 |
| Ag | 0.11303  | -1.90784 | 0.07908  |
| Ag | -0.34736 | 3.53188  | -0.48813 |
| O  | 1.81142  | 3.27142  | -0.68593 |
| O  | 2.21074  | -1.30753 | -0.21909 |
| N  | 4.07157  | -0.06713 | -0.56954 |
| C  | 4.86931  | -1.30193 | -0.5231  |
| H  | 4.74525  | -1.79184 | 0.44859  |
| H  | 4.54118  | -1.98927 | -1.31017 |
| H  | 5.91944  | -1.03955 | -0.67457 |
| C  | 3.96082  | 2.32212  | -0.82117 |
| C  | 4.60124  | 3.66273  | -1.04181 |
| H  | 5.68791  | 3.56552  | -1.14847 |
| H  | 4.38996  | 4.33887  | -0.20233 |
| H  | 4.20122  | 4.14182  | -1.94583 |
| C  | 4.66329  | 1.15861  | -0.77146 |
| H  | 5.74459  | 1.13624  | -0.89043 |



ag2433h4

|    |          |          |          |
|----|----------|----------|----------|
| N  | -2.38131 | 0.81386  | 0.01913  |
| C  | -3.14393 | 1.93527  | -0.03978 |
| C  | -4.57899 | 1.80646  | 0.13     |
| C  | -5.05929 | 0.54835  | 0.33552  |
| N  | -4.25822 | -0.56618 | 0.38754  |
| C  | -2.88765 | -0.44599 | 0.2282   |
| O  | -2.13279 | -1.43019 | 0.2697   |
| O  | -2.6316  | 3.08638  | -0.23915 |
| C  | -4.80834 | -1.90848 | 0.61073  |
| Ag | -0.27337 | 0.54793  | -0.17038 |
| H  | -6.12324 | 0.36182  | 0.47092  |
| H  | -4.55868 | -2.55993 | -0.23413 |
| H  | -5.89419 | -1.82804 | 0.71038  |
| H  | -4.38147 | -2.34101 | 1.52252  |
| C  | -5.45747 | 3.02492  | 0.07458  |
| H  | -5.35712 | 3.53839  | -0.89143 |
| H  | -5.17491 | 3.74872  | 0.85133  |
| H  | -6.51028 | 2.75395  | 0.21762  |
| C  | 2.70731  | -0.30296 | -0.39237 |
| C  | 2.36385  | 2.0135   | -0.62375 |
| N  | 1.87613  | 0.74329  | -0.42448 |
| Ag | -0.53128 | 3.34073  | -0.49349 |
| O  | 1.6513   | 3.03865  | -0.66751 |
| O  | 2.22626  | -1.52265 | -0.19971 |
| H  | 1.25712  | -1.52544 | -0.09532 |
| C  | 4.11622  | -0.19375 | -0.55642 |
| C  | 5.01364  | -1.3998  | -0.51562 |
| H  | 4.92683  | -1.92162 | 0.44665  |
| H  | 4.74159  | -2.11807 | -1.30047 |
| H  | 6.05952  | -1.10704 | -0.65961 |
| N  | 3.73194  | 2.16206  | -0.78486 |
| C  | 4.25267  | 3.52576  | -0.99586 |
| H  | 5.33842  | 3.4675   | -1.10293 |
| H  | 3.99186  | 4.15533  | -0.13894 |
| H  | 3.80749  | 3.95337  | -1.90011 |
| C  | 4.56653  | 1.08419  | -0.75004 |
| H  | 5.62378  | 1.30204  | -0.88695 |

ag2424h3

|    |          |          |          |
|----|----------|----------|----------|
| N  | -2.16358 | 0.00718  | 0.0015   |
| C  | -2.7694  | -1.22615 | 0.00692  |
| N  | -4.13623 | -1.21451 | 0.00942  |
| C  | -4.82931 | -0.0193  | 0.00675  |
| C  | -4.23981 | 1.20902  | 0.00075  |
| C  | -2.79503 | 1.24257  | -0.00215 |
| O  | -2.11961 | 2.2914   | -0.00736 |
| O  | -2.12085 | -2.29002 | 0.00937  |
| C  | -5.00653 | 2.50076  | -0.00248 |
| H  | -1.1414  | 0.00304  | 0.00005  |
| H  | -5.91225 | -0.12423 | 0.00972  |
| H  | -4.7481  | 3.10789  | 0.87554  |
| H  | -6.08607 | 2.31473  | 0.00502  |
| H  | -4.75866 | 3.09725  | -0.89084 |
| C  | -4.8346  | -2.51446 | 0.01457  |
| H  | -4.55493 | -3.08154 | 0.90863  |
| H  | -4.55704 | -3.08735 | -0.87646 |
| H  | -5.91031 | -2.32454 | 0.01516  |
| C  | 2.71249  | 1.15771  | 0.00701  |
| C  | 2.74391  | -1.17965 | -0.00397 |
| N  | 2.05399  | -0.01288 | 0.00025  |
| Ag | 0.03884  | 2.37974  | -0.00778 |
| Ag | 0.05226  | -2.37564 | -0.00414 |
| O  | 2.13613  | -2.30669 | -0.01038 |
| O  | 2.12446  | 2.29393  | 0.00956  |
| N  | 4.09193  | 1.19736  | 0.0124   |
| C  | 4.76992  | 2.50035  | 0.02181  |
| H  | 4.49122  | 3.07626  | -0.86739 |
| H  | 4.48063  | 3.06856  | 0.91254  |
| H  | 5.84957  | 2.32778  | 0.02758  |
| C  | 4.19503  | -1.19223 | -0.00149 |
| C  | 4.94753  | -2.49209 | -0.0076  |
| H  | 6.0304   | -2.31915 | -0.00879 |
| H  | 4.68669  | -3.09059 | -0.89114 |
| H  | 4.68986  | -3.09717 | 0.87245  |
| C  | 4.80384  | 0.02293  | 0.00712  |
| H  | 5.88669  | 0.13038  | 0.01024  |

ag2244h3

|    |          |          |          |
|----|----------|----------|----------|
| N  | -2.16411 | 0.01525  | 0.00471  |
| C  | -2.75568 | -1.22382 | 0.01267  |
| N  | -4.12205 | -1.22831 | 0.01128  |
| C  | -4.82944 | -0.04074 | 0.00182  |
| C  | -4.25439 | 1.19402  | -0.0074  |
| C  | -2.80968 | 1.24457  | -0.00558 |
| O  | -2.14516 | 2.29906  | -0.01249 |
| O  | -2.09566 | -2.28185 | 0.02073  |
| C  | -5.03536 | 2.47703  | -0.01847 |
| H  | -1.14194 | 0.02759  | 0.00813  |
| H  | -5.91102 | -0.15861 | 0.00188  |
| H  | -4.78594 | 3.09067  | 0.85763  |
| H  | -6.11283 | 2.2793   | -0.01345 |
| H  | -4.79092 | 3.07241  | -0.90852 |
| C  | -4.80601 | -2.53579 | 0.01965  |
| H  | -4.5234  | -3.09613 | 0.91705  |
| H  | -4.51963 | -3.10938 | -0.86813 |
| H  | -5.88372 | -2.35771 | 0.01601  |
| C  | 2.7217   | 1.19282  | 0.01054  |
| C  | 2.73468  | -1.14463 | -0.01073 |
| N  | 2.054    | 0.0129   | -0.0008  |
| Ag | 0.01783  | 2.38872  | -0.00573 |
| Ag | 0.07288  | -2.36587 | -0.00045 |
| O  | 2.16585  | -2.29137 | -0.02042 |
| O  | 2.09505  | 2.30864  | 0.01639  |
| C  | 4.17277  | 1.23158  | 0.01614  |
| C  | 4.90078  | 2.54519  | 0.03286  |
| H  | 4.63352  | 3.15152  | -0.84344 |
| H  | 4.6267   | 3.13255  | 0.91994  |
| H  | 5.98663  | 2.39255  | 0.0356   |
| N  | 4.11418  | -1.15948 | -0.01142 |
| C  | 4.81599  | -2.44965 | -0.02374 |
| H  | 5.89222  | -2.25707 | -0.03105 |
| H  | 4.53579  | -3.02149 | -0.91495 |
| H  | 4.54963  | -3.032   | 0.86521  |
| C  | 4.80429  | 0.02822  | 0.00308  |
| H  | 5.88895  | -0.05953 | 0.00315  |

ag2433h4'

|    |          |          |          |
|----|----------|----------|----------|
| N  | -2.43502 | 0.7764   | 0.0357   |
| C  | -3.17057 | 1.91471  | -0.02232 |
| C  | -4.6098  | 1.82904  | 0.1441   |
| C  | -5.12818 | 0.58636  | 0.34696  |
| N  | -4.35865 | -0.54862 | 0.39903  |
| C  | -2.98164 | -0.46862 | 0.24268  |
| O  | -2.26316 | -1.47626 | 0.28635  |
| O  | -2.63288 | 3.05569  | -0.21891 |
| C  | -4.94488 | -1.87498 | 0.61966  |
| Ag | -0.31364 | 0.42738  | -0.15223 |
| H  | -6.19751 | 0.43064  | 0.4797   |
| H  | -4.70779 | -2.53362 | -0.22333 |
| H  | -6.02893 | -1.76622 | 0.7138   |
| H  | -4.53393 | -2.31914 | 1.53331  |
| C  | -5.45098 | 3.07354  | 0.08742  |
| H  | -5.33521 | 3.58362  | -0.87878 |
| H  | -5.1476  | 3.7895   | 0.86366  |
| H  | -6.51164 | 2.83432  | 0.23006  |
| C  | 2.68861  | -0.27045 | -0.40524 |
| C  | 2.34952  | 2.03691  | -0.62625 |
| N  | 1.86183  | 0.77224  | -0.43199 |
| Ag | -0.53729 | 3.24951  | -0.46962 |
| O  | 1.64454  | 3.06516  | -0.66575 |
| O  | 2.07472  | -1.43567 | -0.20804 |
| H  | 2.69594  | -2.17908 | -0.19173 |
| C  | 4.09783  | -0.16777 | -0.57027 |
| C  | 5.0019   | -1.37219 | -0.53538 |
| H  | 4.94763  | -1.89329 | 0.4327   |
| H  | 4.75094  | -2.09148 | -1.32997 |
| H  | 6.04633  | -1.077   | -0.68528 |
| N  | 3.72392  | 2.18693  | -0.79033 |
| C  | 4.24329  | 3.55175  | -0.99707 |
| H  | 5.32914  | 3.49604  | -1.10588 |
| H  | 3.98126  | 4.17734  | -0.13766 |
| H  | 3.79491  | 3.98168  | -1.89861 |
| C  | 4.55358  | 1.1113   | -0.76075 |
| H  | 5.61175  | 1.32564  | -0.89825 |

ag2343h4'

|    |          |          |          |
|----|----------|----------|----------|
| N  | -2.38062 | -0.19087 | 0.0024   |
| C  | -3.42718 | -1.08373 | 0.01146  |
| N  | -4.71452 | -0.5608  | 0.01408  |
| C  | -4.91003 | 0.79638  | 0.00743  |
| C  | -3.88806 | 1.69733  | -0.00197 |
| C  | -2.54341 | 1.15355  | -0.00405 |
| O  | -1.54502 | 1.95224  | -0.01189 |
| O  | -3.22129 | -2.30324 | 0.01692  |
| C  | -4.10219 | 3.18521  | -0.00988 |
| Ag | 0.45127  | 1.26885  | -0.00875 |
| H  | -5.9504  | 1.11744  | 0.01003  |
| H  | -3.63623 | 3.65534  | 0.86713  |
| H  | -5.17214 | 3.42553  | -0.00539 |
| H  | -3.64609 | 3.64439  | -0.89783 |
| C  | -5.8344  | -1.50849 | 0.02469  |
| H  | -5.78322 | -2.13821 | 0.92004  |
| H  | -5.78392 | -2.15639 | -0.85751 |
| H  | -6.77057 | -0.94329 | 0.01941  |
| C  | 3.53337  | 1.09394  | 0.00928  |
| C  | 2.55447  | -1.03707 | -0.00851 |
| N  | 2.44366  | 0.33045  | -0.00172 |
| Ag | -0.59164 | -1.39665 | -0.00517 |
| O  | 1.58717  | -1.81913 | -0.01944 |
| O  | 3.27482  | 2.40235  | 0.0141   |
| H  | 4.08656  | 2.93153  | 0.0219   |
| C  | 4.85942  | 0.58051  | 0.01565  |
| C  | 6.07001  | 1.47701  | 0.02869  |
| H  | 6.1069   | 2.12478  | -0.86064 |
| H  | 6.09366  | 2.11673  | 0.92426  |
| H  | 6.99086  | 0.88331  | 0.03282  |
| N  | 3.83638  | -1.58369 | -0.00313 |
| C  | 3.94859  | -3.05458 | -0.01059 |
| H  | 5.00829  | -3.3213  | -0.00492 |
| H  | 3.46267  | -3.45384 | -0.90674 |
| H  | 3.4506   | -3.46374 | 0.8744   |
| C  | 4.93698  | -0.78895 | 0.00877  |
| H  | 5.89486  | -1.30579 | 0.0126   |

ag2343h4

|    |          |          |          |
|----|----------|----------|----------|
| N  | -2.60336 | 1.34097  | -0.02643 |
| C  | -3.53531 | 2.35129  | -0.0542  |
| N  | -4.86613 | 2.00111  | 0.12608  |
| C  | -5.21392 | 0.68939  | 0.32261  |
| C  | -4.30695 | -0.32794 | 0.35386  |
| C  | -2.91835 | 0.03972  | 0.16526  |
| O  | -2.01679 | -0.87095 | 0.1834   |
| O  | -3.18614 | 3.52536  | -0.23414 |
| C  | -4.68918 | -1.76576 | 0.56981  |
| Ag | 0.00411  | -0.37128 | -0.09369 |
| H  | -6.27866 | 0.50473  | 0.45499  |
| H  | -4.37629 | -2.38879 | -0.27939 |
| H  | -5.77403 | -1.86679 | 0.69286  |
| H  | -4.19848 | -2.17405 | 1.46408  |
| C  | -5.86509 | 3.07624  | 0.09676  |
| H  | -5.8359  | 3.58663  | -0.87239 |
| H  | -5.64731 | 3.8089   | 0.88175  |
| H  | -6.85406 | 2.63871  | 0.25844  |
| C  | 3.08659  | -0.71007 | -0.41077 |
| C  | 2.35906  | 1.52204  | -0.56589 |
| N  | 2.09083  | 0.18164  | -0.3925  |
| Ag | -0.71769 | 2.3718   | -0.34113 |
| O  | 1.49012  | 2.41461  | -0.56297 |
| O  | 2.81769  | -1.99843 | -0.24316 |
| H  | 1.8636   | -2.14783 | -0.1191  |
| C  | 4.45275  | -0.36679 | -0.60266 |
| C  | 5.53712  | -1.40893 | -0.61586 |
| H  | 5.56579  | -1.95921 | 0.33403  |
| H  | 5.36632  | -2.14444 | -1.41321 |
| H  | 6.51584  | -0.94368 | -0.77692 |
| N  | 3.68128  | 1.89662  | -0.75503 |
| C  | 3.96185  | 3.33329  | -0.93909 |
| H  | 5.03868  | 3.45993  | -1.07409 |
| H  | 3.62406  | 3.88893  | -0.05831 |
| H  | 3.42521  | 3.70217  | -1.81919 |
| C  | 4.68181  | 0.97254  | -0.77058 |
| H  | 5.68486  | 1.36474  | -0.92606 |

ag2233h4

|    |          |          |          |
|----|----------|----------|----------|
| N  | -2.10401 | 0.38846  | -0.00647 |
| C  | -2.85754 | -0.72336 | 0.00391  |
| N  | -4.22776 | -0.58612 | 0.00639  |
| C  | -4.79302 | 0.67581  | 0.00281  |
| C  | -4.06427 | 1.82302  | -0.00429 |
| C  | -2.61706 | 1.67296  | -0.00817 |
| O  | -1.80004 | 2.61644  | -0.01242 |
| O  | -2.37229 | -1.90113 | 0.01336  |
| C  | -4.67318 | 3.19534  | -0.00701 |
| Ag | 0.0231   | 0.76368  | -0.01005 |
| H  | -5.88132 | 0.68855  | 0.00654  |
| H  | -4.34347 | 3.76818  | 0.87069  |
| H  | -5.76841 | 3.14277  | -0.00173 |
| H  | -4.35174 | 3.76118  | -0.89233 |
| C  | -5.06054 | -1.79578 | 0.01615  |
| H  | -4.85165 | -2.39155 | 0.91163  |
| H  | -4.85059 | -2.40582 | -0.86936 |
| H  | -6.11063 | -1.49207 | 0.013    |
| C  | 3.03834  | 1.54755  | 0.00785  |
| C  | 2.67463  | -0.77576 | -0.01238 |
| N  | 2.19451  | 0.51222  | -0.00562 |
| H  | 1.59251  | 2.80849  | 0.01227  |
| Ag | -0.23343 | -2.0853  | 0.00805  |
| O  | 1.94782  | -1.79242 | -0.02123 |
| O  | 2.56644  | 2.78533  | 0.01799  |
| C  | 4.45467  | 1.40823  | 0.01341  |
| C  | 5.36579  | 2.60443  | 0.03034  |
| H  | 5.19328  | 3.24139  | -0.8473  |
| H  | 5.18562  | 3.22188  | 0.92039  |
| H  | 6.41556  | 2.29061  | 0.03142  |
| N  | 4.04699  | -0.95466 | -0.01061 |
| C  | 4.55956  | -2.33743 | -0.0214  |
| H  | 5.6516   | -2.30064 | -0.02152 |
| H  | 4.20045  | -2.85537 | -0.91672 |
| H  | 4.20105  | -2.86952 | 0.86571  |
| C  | 4.89637  | 0.11354  | 0.00222  |
| H  | 5.95715  | -0.12842 | 0.00336  |

ag4433h2

|    |          |          |          |
|----|----------|----------|----------|
| N  | 2.17023  | 0.49058  | 0.00008  |
| C  | 2.96638  | 1.54913  | -0.00547 |
| N  | 4.31235  | 1.47466  | -0.0038  |
| C  | 4.89655  | 0.22017  | 0.00612  |
| C  | 4.16327  | -0.92244 | 0.01201  |
| C  | 2.71318  | -0.79303 | 0.0073   |
| O  | 1.98898  | -1.81134 | 0.01033  |
| O  | 2.48895  | 2.7877   | -0.01328 |
| C  | 4.77712  | -2.29141 | 0.02261  |
| Ag | 0.0072   | 0.67969  | 0.00195  |
| H  | 5.9838   | 0.21782  | 0.0086   |
| H  | 4.44818  | -2.8535  | 0.90705  |
| H  | 5.87121  | -2.23377 | 0.02584  |
| H  | 4.45411  | -2.86448 | -0.85695 |
| C  | 5.13141  | 2.70555  | -0.01201 |
| H  | 4.91231  | 3.30449  | 0.87779  |
| H  | 4.9128   | 3.29213  | -0.91017 |
| H  | 6.18263  | 2.40941  | -0.00982 |
| C  | -2.84682 | -0.731   | -0.00111 |
| C  | -2.64454 | 1.67106  | 0.00419  |
| N  | -2.10686 | 0.40765  | 0.00161  |
| Ag | -0.18601 | -2.12978 | -0.00942 |
| H  | 1.51488  | 2.79131  | -0.01572 |
| O  | -1.90907 | 2.67129  | 0.00541  |
| O  | -2.30381 | -1.88447 | -0.00657 |
| C  | -4.29324 | -0.61553 | 0.00236  |
| C  | -5.14795 | -1.85195 | 0.00309  |
| H  | -4.94061 | -2.47339 | -0.87891 |
| H  | -4.94071 | -2.47236 | 0.88579  |
| H  | -6.21286 | -1.59067 | 0.00325  |
| N  | -4.02568 | 1.77785  | 0.00496  |
| C  | -4.61072 | 3.12371  | 0.00663  |
| H  | -4.28192 | 3.67526  | -0.88107 |
| H  | -4.28603 | 3.67217  | 0.89798  |
| H  | -5.70013 | 3.0304   | 0.00426  |
| C  | -4.80542 | 0.64661  | 0.00439  |
| H  | -5.87956 | 0.82364  | 0.00556  |
